# Supplementary material
Source: PubMed Central journal article supplement (PMC4563861)
Supplement: NIHMS717197-supplement-Supp_Data.pdf [file NIHMS717197-supplement-Supp_Data.pdf]

Web Appendix for:

Risk of leukemia mortality from exposure to ionizing radiation in U.S. nuclear workers: a pooled case-control study.

Robert D. Daniels<sup>1\*</sup>, Stephen Bertke<sup>1</sup>, Kathleen M. Waters<sup>1</sup> and Mary K. Schubauer-Berigan<sup>1</sup>

<sup>1</sup>National Institute for Occupational Safety and Health (NIOSH); Division of Surveillance, Hazard Evaluations, and Field Studies (DSHEFS); Industrywide Studies Branch (IWSB); 4676 Columbia Parkway, Cincinnati, OH 45226

\*Corresponding author; NIOSH, DSHEFS, IWSB, 4676 Columbia Parkway, Mailstop R-13, Cincinnati, OH 45226

Disclaimer: The findings and conclusions in this report are those of the authors and do not necessarily represent the views of the National Institute for Occupational Safety and Health

Table 1. Characteristics of the base cohort assembled for case-control selection

|                         |                       | All       | Main sites |           |                        |           |           |           |
|-------------------------|-----------------------|-----------|------------|-----------|------------------------|-----------|-----------|-----------|
|                         |                       |           | Hanford    | INL       | LANL/Zia               | PNS       | SRS       | ORNL      |
| Subjects                | N                     | 105,245   | 23,177     | 33,473    | 12,296                 | 9,657     | 12,585    | 14,057    |
| Sex                     | male                  | 85,726    | 16,672     | 27,802    | 10,343                 | 9,619     | 10,868    | 10,422    |
|                         | female                | 19,158    | 6,503      | 5,667     | 1,688                  | 38        | 1,627     | 3,635     |
|                         | unknown               | 361       | 2          | 4         | 265                    | 0         | 90        | 0         |
| Race                    | White                 | 85,041    | 21,666     | 28,619    | 6,953                  | 9,607     | 5,284     | 1,2912    |
|                         | other                 | 4,214     | 1,491      | 1,027     | 168                    | 22        | 599       | 906       |
|                         | unknown               | 15,991    | 20         | 3,827     | 5,175                  | 28        | 6,702     | 239       |
| Birth year              | median                | 1936      | 1938       | 1942      | 1937                   | 1926      | 1928      | 1937      |
|                         | range                 | 1884-1974 | 1887-1962  | 1884-1974 | 1885-1964              | 1889-1960 | 1892-1958 | 1891-1960 |
| Employment              | median hire year      | 1965      | 1967       | 1974      | 1967                   | 1959      | 1953      | 1965      |
|                         | median emp years      | 8.4       | 6.3        | 7.3       | 9.9                    | 23.8      | 11.5      | 4.0       |
|                         | period of eligibility |           | 1951-1978  | 1949-1999 | 1951-1978 <sup>†</sup> | 1952-1977 | 1951-1974 | 1951-1978 |
| Deaths                  | deceased              | 30,266    | 5,684      | 7,332     | 3,041                  | 4,995     | 5,932     | 3,282     |
|                         | cancer deaths         | 8,721     | 1,705      | 2,050     | 794                    | 1,503     | 1,681     | 988       |
|                         | leukemia deaths       | 369       | 58         | 90        | 46                     | 48        | 78        | 49        |
|                         | missing UCOD          | 423       | 55         | 176       | 37                     | 39        | 67        | 49        |
| Dose (mSv) <sup>‡</sup> | cumulative            |           |            |           |                        |           |           |           |
|                         | average               | 17.8      | 16.9       | 13.8      | 8.2                    | 24.2      | 29.8      | 8.8       |
|                         | annual avg.           |           |            |           |                        |           |           |           |
|                         | all years             | 1.8       | 1.8        | 1.7       | 0.9                    | 3.5       | 2.5       | 0.8       |
|                         | <1960                 | 2.4       | 2.2        | 3.4       | 3.7                    | 5.5       | 1.5       | 2.9       |
| 1960-<1980              | 2.6                   | 2.8       | 3.0        | 0.9       | 4.1                    | 3.5       | 0.9       |           |
| ≥1980                   | 0.6                   | 0.6       | 0.6        | 0.4       | 1.4                    | 0.7       | 0.2       |           |

\* Abbreviations: HAN (Hanford site); INL (Idaho National Laboratory); LANL (Los Alamos National Laboratory incl. Zia Company); ORNL (Oak Ridge National Laboratory); PNS (Portsmouth Naval Shipyard); SRS (Savannah River Site); UCOD (underlying cause of death).

<sup>†</sup> A small number of workers who were first employed after 1978 were included if they otherwise met the cohort criteria.

<sup>‡</sup> All doses reported in equivalent dose (mSv) to the whole-body from low-LET penetrating radiation based on site dosimetry records.

Table 2. Leukemia case distribution

|           | Chronic | Acute | Other | Unknown | Total |
|-----------|---------|-------|-------|---------|-------|
| Lymphoid  | 74      | 18    | 1     | 9       | 102   |
| Myeloid   | 52      | 139   | 0     | 1       | 192   |
| Monocytic | 0       | 11    | 0     | 1       | 12    |
| Other     | 0       | 1     | 4     | 0       | 5     |
| Unknown   | 1       | 35    | 1     | 21      | 58    |
| Total:    | 127     | 201   | 9     | 32      | 369   |

Chronic Lymphocytic (CLL)

Indeterminate

Table 3. Characteristics of cases and controls

| <b>Variable</b>    |                    | <b>Cases</b> | <b>Controls</b> | <b>Total</b> |
|--------------------|--------------------|--------------|-----------------|--------------|
| Cases and controls | N                  | 369          | 1476            | 1845         |
| Sex (%)            | Male               | 333 (90.2)   | 1,283 (86.9)    | 1,616 (87.6) |
|                    | Female             | 36 (9.8)     | 193 (13.11)     | 229 (12.40)  |
| Race/ethnicity (%) | White non-Hispanic | 301 (81.6)   | 1249 (84.6)     | 1,550 (84.1) |
|                    | Hispanic           | 12 (3.3)     | 19 (1.3)        | 31 (1.7)     |
|                    | Other              | 13 (3.5)     | 31 (2.1)        | 44 (2.4)     |
|                    | Unknown            | 43 (11.7)    | 177 (12.0)      | 220 (11.9)   |
| Birth year (%)     | ≤ 1919             | 110 (29.8)   | 565 (38.3)      | 666 (36.1)   |
|                    | 1920-≤1927         | 124 (33.6)   | 437 (29.6)      | 572 (31.0)   |
|                    | >1927              | 135 (36.6)   | 474 (32.1)      | 607 (32.9)   |
| Hire year (%)      | ≤ 1952             | 117 (31.7)   | 549 (37.2)      | 668 (36.1)   |
|                    | 1953-≤ 1959        | 131 (35.5)   | 441 (29.9)      | 573 (31.0)   |
|                    | >1959              | 121 (32.8)   | 486 (32.9)      | 609 (32.9)   |
| Facility (%)       | HAN                | 55 (14.9)    | 349 (23.6)      | 385 (20.9)   |
|                    | INL                | 91 (24.7)    | 371 (25.1)      | 287 (15.6)   |
|                    | LANL               | 48 (13.0)    | 116 (7.9)       | 212 (11.5)   |
|                    | ORNL               | 49 (13.3)    | 165 (11.2)      | 678 (36.8)   |
|                    | PNS                | 48 (13.0)    | 243 (16.5)      | 87 (4.7)     |
|                    | SRS                | 78 (21.1)    | 232 (15.7)      | 196 (10.6)   |

\* Abbreviations: HAN (Hanford site); INL (Idaho National Laboratory); LANL (Los Alamos National Laboratory incl. Zia Company); ORNL (Oak Ridge National Laboratory); PNS (Portsmouth Naval Shipyard); SRS (Savannah River Site);

Table 4. Summary of exposure information for cases and controls (two-year lag)

| Variable       | Statistic                                      | Cases      | Controls     | Total        |
|----------------|------------------------------------------------|------------|--------------|--------------|
| Subjects       | n                                              | 369        | 1,476        | 1,845        |
| Gamma (mGy)    | mean                                           | 24.4       | 22.9         | 23.4         |
|                | median                                         | 3.3        | 2.8          | 2.9          |
|                | maximum                                        | 626.3      | 566.3        | 626.3        |
|                | exposed (%)                                    | 367 (99.5) | 1,458 (98.8) | 1,825 (98.9) |
|                | Tritium (mGy)                                  | mean       | 0.2          | 0.2          |
|                | median                                         | 0.0        | 0.0          | 0.0          |
|                | maximum                                        | 28.3       | 85.1         | 85.1         |
|                | exposed (%)                                    | 66 (17.9)  | 227 (15.4)   | 293 (15.9)   |
| WRX (mGy)      | mean                                           | 2.6        | 3.3          | 3.2          |
|                | median                                         | 0.0        | 0.0          | 0.0          |
|                | maximum                                        | 15.4       | 28.6         | 28.6         |
|                | exposed (%)                                    | 175 (47.4) | 728 (49.3)   | 903 (48.9)   |
|                | Low-LET<br>(sum of Gamma,<br>Tritium, and WRX) | Mean       | 27.3         | 26.3         |
|                | Median                                         | 5.8        | 7.5          | 7.2          |
|                | maximum                                        | 633.8      | 574.0        | 633.8        |
|                | Exposed (%)                                    | 367 (99.5) | 1,464 (99.2) | 1,831 (99.2) |
| Neutron (mGy)  | mean                                           | 0.4        | 0.0          | 0.0          |
|                | median                                         | 0.1        | 0.0          | 0.0          |
|                | maximum                                        | 4.9        | 6.9          | 6.9          |
|                | exposed (%)                                    | 52 (14.1)  | 185 (12.5)   | 237 (12.8)   |
|                | Plutonium (mGy)                                | mean       | 2.0          | 0.1          |
| median         |                                                | 0.0        | 0.0          | 0.0          |
| maximum        |                                                | 49.1       | 20.9         | 49.1         |
| exposed (%)    |                                                | 31 (8.4)   | 99 (6.7)     | 130 (7.0)    |
| Benzene scores |                                                | mean       | 0.8          | 2.1          |
|                | median                                         | 0.0        | 0.0          | 0.0          |
|                | maximum                                        | 61.0       | 283.9        | 283.9        |
|                | exposed (%)                                    | 69 (18.7)  | 291 (19.7)   | 360 (19.5)   |

\*Ionizing radiation “dose” is defined as absorbed dose to red bone marrow.

Table 5. Univariate analysis of covariates

| Variable*                                             | Description                 | Cases (n=369) | Controls (n=1,476) | Total (n=1,845) | Hazard Ratio (95% CI) |
|-------------------------------------------------------|-----------------------------|---------------|--------------------|-----------------|-----------------------|
| Sex (%)                                               | Male                        | 333 (90.2)    | 1,283 (86.9)       | 1,616 (87.6)    | 1.0                   |
|                                                       | Female                      | 36 (9.8)      | 193 (13.1)         | 229 (12.4)      | 0.72 (0.49, 1.04)     |
| Race (%)                                              | White non-Hispanic          | 344 (93.2)    | 1,426 (96.6)       | 1,770 (95.9)    | 1.0                   |
|                                                       | Other                       | 25 (6.8)      | 50 (3.4)           | 75 (4.1)        | 2.13 (1.27, 3.52)     |
| Birth year (%)                                        | Birth year <1920            | 110 (29.8)    | 565 (38.3)         | 675 (36.6)      | 1.0                   |
|                                                       | Birth year 1920-1927        | 124 (33.6)    | 437 (29.6)         | 561 (30.4)      | 1.53 (1.14, 2.07)     |
|                                                       | Birth year >1927            | 135 (36.6)    | 474 (32.1)         | 609 (33.0)      | 1.68 (1.20, 2.37)     |
| Hire year (%)                                         | Hire year <1953             | 117 (31.7)    | 549 (37.2)         | 666 (36.1)      | 1.0                   |
|                                                       | Hire year 1953-1959         | 131 (35.5)    | 441 (29.9)         | 572 (31.0)      | 1.43 (1.07, 1.91)     |
|                                                       | Hire year > 1959            | 121 (32.8)    | 486 (32.9)         | 607 (32.9)      | 1.20 (0.88, 1.62)     |
| SES (%)                                               | Professional                | 81 (22.0)     | 304 (20.6)         | 385 (20.9)      | 1.0                   |
|                                                       | Intermediate                | 50 (13.6)     | 237 (16.1)         | 287 (15.6)      | 0.79 (0.53, 1.17)     |
|                                                       | Skilled non-manual          | 36 (9.8)      | 176 (11.9)         | 212 (11.5)      | 0.76 (0.49, 1.17)     |
|                                                       | Skilled manual              | 140 (37.9)    | 538 (36.5)         | 678 (36.8)      | 0.98 (0.72, 1.34)     |
|                                                       | Partly skilled              | 21 (5.7)      | 66 (4.5)           | 87 (4.7)        | 1.20 (0.68, 2.05)     |
|                                                       | Unskilled                   | 41 (11.1)     | 155 (10.5)         | 196 (10.6)      | 1.00 (0.65, 1.50)     |
| Low-LET <sup>†</sup> dose distribution (%)            | 0-<1.0 mGy                  | 95 (25.8)     | 353 (23.9)         | 448 (24.3)      | 1.0                   |
|                                                       | 1-<10 mGy                   | 123 (33.3)    | 503 (34.1)         | 626 (33.9)      | 0.90 (0.65, 1.23)     |
|                                                       | 10-<50 mGy                  | 101 (27.4)    | 434 (29.4)         | 535 (29.0)      | 0.85 (0.61, 1.18)     |
|                                                       | 50-<100 mGy                 | 24 (6.5)      | 77 (5.2)           | 101 (5.5)       | 1.14 (0.67, 1.88)     |
|                                                       | ≥100 mGy                    | 26 (7.1)      | 109 (7.4)          | 135 (7.3)       | 0.87 (0.52, 1.42)     |
| Max plutonium <sup>†</sup> urine bioassay results (%) | unmonitored                 | 254 (68.8)    | 1,037 (70.3)       | 1,291 (70.0)    | 1.0                   |
|                                                       | 0-<1.7 mBq·d <sup>-1</sup>  | 86 (23.3)     | 340 (23.0)         | 426 (23.1)      | 1.04 (0.78, 1.38)     |
|                                                       | 1.7-<17 mBq·d <sup>-1</sup> | 23 (6.2)      | 81 (5.5)           | 104 (5.6)       | 1.17 (0.70, 1.89)     |
|                                                       | ≥17 mBq·d <sup>-1</sup>     | 6 (1.6)       | 18 (1.2)           | 24 (1.3)        | 1.36 (0.49, 3.26)     |
| Benzene <sup>†</sup> (%)                              | Unexposed (score=0)         | 300 (81.3)    | 1,185 (80.3)       | 1,485 (80.5)    | 1.0                   |
|                                                       | Low 0-<median exposed       | 37 (10.3)     | 143 (9.7)          | 180 (9.8)       | 1.02 (0.69, 1.48)     |
|                                                       | High > median exposed       | 32 (8.7)      | 148 (10.0)         | 180 (9.8)       | 0.85 (0.55, 1.26)     |

\*Abbreviations: LET (linear energy transfer); SES (socioeconomic status).

<sup>†</sup>Exposure categories (low-LET, plutonium, and benzene) are under a 2-year lag.

Alternate lag assumptions: All models were examined under alternate exposure lag assumptions of 0-, 2-, 5-, 7-, and 10 years. CLL models also included exposure lags of 15-, 20, 25, and 30 years. The preferred exposure lag period was determined based on the lowest model deviance after adjustment for relevant cofactors.

Table 6. The effects of exposure lag on the excess relative risk of leukemia mortality from radiation dose

| Outcome:<br>Adjust for: | Non-CLL (n=264)<br>race, sex, and hire date |         |        | AML (n=150)<br>birth date |         |        | CML (n=52)<br>race, sex, and hire date |         |        | CLL (n=74)<br>race, sex, and birth date |         |        |
|-------------------------|---------------------------------------------|---------|--------|---------------------------|---------|--------|----------------------------------------|---------|--------|-----------------------------------------|---------|--------|
| Lag<br>(years)          | ERR per<br>100 mGy                          | P-value | -2LL   | ERR per<br>100 mGy        | P-value | -2LL   | ERR per<br>100 mGy                     | P-value | -2LL   | ERR per<br>100 mGy                      | P-value | -2LL   |
| 0                       | 0.08                                        | 0.568   | 840.95 | 0.22                      | 0.320   | 474.93 | 0.26                                   | 0.429   | 158.15 | -0.038                                  | 0.770   | 227.47 |
| 2                       | 0.09                                        | 0.522   | 840.87 | 0.23                      | 0.312   | 474.89 | 0.28                                   | 0.404   | 158.07 | -0.038                                  | 0.770   | 227.47 |
| 5                       | 0.09                                        | 0.529   | 840.88 | 0.23                      | 0.322   | 474.94 | 0.29                                   | 0.398   | 158.05 | -0.038                                  | 0.772   | 227.48 |
| 7                       | 0.08                                        | 0.575   | 840.96 | 0.20                      | 0.367   | 475.10 | 0.28                                   | 0.403   | 158.07 | -0.037                                  | 0.783   | 227.48 |
| 10                      | 0.06                                        | 0.697   | 841.13 | 0.16                      | 0.471   | 475.40 | 0.24                                   | 0.458   | 158.22 | -0.036                                  | 0.789   | 227.49 |
| 15                      |                                             |         |        |                           |         |        |                                        |         |        | -0.026                                  | 0.850   | 225.16 |
| 20                      |                                             |         |        |                           |         |        |                                        |         |        | -0.024                                  | 0.868   | 225.17 |
| 25                      |                                             |         |        | Restricted to CLL models  |         |        |                                        |         |        | -0.029                                  | 0.841   | 225.16 |
| 30                      |                                             |         |        |                           |         |        |                                        |         |        | -0.020                                  | 0.915   | 225.19 |

\*Abbreviations: AML (acute myeloid leukemia); CML (chronic myeloid leukemia); CLL (chronic lymphocytic leukemia); ERR (excess relative risk); LL (log likelihood).

Time since exposure: Models were constructed following division of cumulative exposure ( $d$ ) into time windows, in years, before the attained age of the case in the risk-set. A linear excess relative risk (ERR) model was used to examine risk in windows individually (Table 7). Simultaneous solutions to windows were obtained using log-linear models and results are reported as relative risk (RR) at 100 mGy [ $RR = \exp(d)$ ] (Table 8). Simultaneous solutions were attempted in ERR models but did not converge due to strong negative effects in the first window. Leukemia risks were assessed in windows of 0-<5, 5-<10, 10-<15, and 15+ years. Given its suspected long latency, CLL risk was further assessed in time periods of 15-<20, 20-<25, 25-<30 and 30+ years (ERR model only).

Table 7. Analysis of radiation and excess leukemia risk by exposure windows in years before the attained age of the case

| Outcome:                | Non-CLL (n=264)          |         |        | AML (n=150)              |         |        | CML (n=52)               |         |        | CLL (n=74)                |         |        |
|-------------------------|--------------------------|---------|--------|--------------------------|---------|--------|--------------------------|---------|--------|---------------------------|---------|--------|
| Adjust for:             | race, sex, and hire date |         |        | birth date               |         |        | race, sex, and hire date |         |        | race, sex, and birth date |         |        |
| Exposure Window (years) | ERR per 100 mGy          | P-value | -2LL   | ERR per 100 mGy          | P-value | -2LL   | ERR per 100 mGy          | P-value | -2LL   | ERR per 100 mGy           | P-value | -2LL   |
| 0-<5                    | -0.26                    | 0.786   | 841.20 | 0.46                     | 0.800   | 475.85 | -9.75                    | 0.458   | 158.22 | -1.10                     | 0.850   | 227.52 |
| 5-<10                   | 1.97                     | 0.120   | 838.86 | 7.81                     | 0.024   | 470.85 | 1.82                     | 0.494   | 158.30 | NC                        | NC      | NC     |
| 10-<15                  | 1.30                     | 0.280   | 840.11 | 4.73                     | 0.072   | 472.69 | 4.38                     | 0.248   | 157.44 | -2.61                     | 0.133   | 225.30 |
| 15+ (15-<20 CLL)        | 0.04                     | 0.280   | 840.11 | 0.11                     | 0.605   | 475.65 | 0.20                     | 0.523   | 158.36 | -0.71                     | 0.710   | 225.06 |
| 20-<25                  |                          |         |        |                          |         |        |                          |         |        | 0.19                      | 0.851   | 225.16 |
| 25-<30                  |                          |         |        | Restricted to CLL models |         |        |                          |         |        | -0.39                     | 0.545   | 224.83 |
| 30+                     |                          |         |        |                          |         |        |                          |         |        | -0.02                     | 0.915   | 225.19 |

\*Abbreviations: AML (acute myeloid leukemia); CML (chronic myeloid leukemia); CLL (chronic lymphocytic leukemia); ERR (excess relative risk); LL (log likelihood); NC (not-calculable)

Table 8. Analysis of radiation and excess leukemia risk in exposure windows in years before the attained age of the case under a log-linear model

| Outcome:<br>Adjust for:    | Non-CLL (n=264)<br>race, sex, and hire date |         | AML (n=150)<br>birth date |         | CML (n=52)<br>race, sex, and hire date |         | CLL (n=74)<br>race, sex, and birth date |         |
|----------------------------|---------------------------------------------|---------|---------------------------|---------|----------------------------------------|---------|-----------------------------------------|---------|
| Exposure Window<br>(years) | RR at 100<br>mGy                            | p-value | RR at 100<br>mGy          | p-value | RR at 100<br>mGy                       | p-value | RR at 100<br>mGy                        | p-value |
| 0-<5                       | 0.12                                        | 0.171   | 0.09                      | 0.192   | 0.00                                   | 0.272   | 1.09                                    | 0.987   |
| 5-<10                      | 10.9                                        | 0.047   | 40.0                      | 0.038   | 4.90                                   | 0.514   | 2.92                                    | 0.786   |
| 10-<15                     | 0.80                                        | 0.777   | 1.12                      | 0.904   | 1.58                                   | 0.792   | 0.01                                    | 0.143   |
| 15+                        | 1.02                                        | 0.906   | 1.05                      | 0.802   | 1.17                                   | 0.564   | 1.04                                    | 0.837   |

\* Abbreviations: AML (acute myeloid leukemia); CML (chronic myeloid leukemia); CLL (chronic lymphocytic leukemia); LL (log likelihood); RR (relative risk);

High-dose worker effects: Models of non-CLL leukemia under the preferred exposure lag were determined using risk sets restricted to subjects who have lagged cumulative low-LET doses <100 mGy. The removal of cases exceeding 100 mGy also meant the removal of matched controls, regardless of cumulative dose. Similarly, the model of the best fit exposure window was restricted to persons in the lower 99% of the dose distribution (i.e., 1% trimming)

Table 9. Summary of final linear modeling results for low-LET radiation and leukemia mortality

| Outcome                       | No. Cases <sup>‡</sup> | Adjusted for:           | Best fit exposure lag ERR per 100 mGy |                     |                   | Best fit exposure window ERR per 100 mGy |                  |                    |
|-------------------------------|------------------------|-------------------------|---------------------------------------|---------------------|-------------------|------------------------------------------|------------------|--------------------|
|                               |                        |                         | Lag (years)                           | Full Model          | Excl. >100 mGy    | Window (years)                           | Full model       | 1% trim            |
| All Leukemia                  | 369                    | sex, race, hire year    | 5                                     | 0.02 (-0.13, 0.29)  | 0.42 (-0.23, 1.4) | 5-10                                     | 1.1 (-0.47, 4.6) | 2.9 (<-0.34, 9.4)  |
| Non-CLL Leukemia <sup>†</sup> | 264                    | sex, race, hire year    | 2                                     | 0.09 (-0.14, 0.51)  | 0.65 (-0.17, 1.9) | 5-10                                     | 2.0 (-0.32, 6.8) | 3.2 (-1.1, 11.0)   |
| AML                           | 150                    | birth cohort            | 2                                     | 0.23 (-0.14, 0.96)  | 0.60 (-0.36, 2.3) | 5-10                                     | 7.8 (0.51, 27.0) | 11.0 (0.017, 38.0) |
| CML                           | 52                     | sex, race, hire year    | 5                                     | 0.29 (<0, 1.8)      | 1.4 (-0.48, 6.2)  | 10-15                                    | 4.4 (<0, 24.0)   | 10 (<0, 40.3)      |
| CLL                           | 74                     | sex, race, birth cohort | 25                                    | -0.03 (-0.15, 0.51) | 0.43 (-0.13, 1.9) | 25-30                                    | -0.20 (NC, NC)   | -0.125 (NC, NC)    |

\* Abbreviations: AML (acute myeloid leukemia); CML (chronic myeloid leukemia); CLL (chronic lymphocytic leukemia); ERR (excess relative risk); NC (not calculable).

<sup>†</sup>Excluding leukemias of CLL and CLL-indeterminate subtypes

<sup>‡</sup>Number of cases in full models (i.e., there are fewer cases in restricted risk sets for trimmed models)
